# Supplementary material
Source: PubMed Central journal article supplement (PMC2544579)
Supplement: 0804139105_0804139105SI.pdf [file 0804139105_0804139105SI.pdf]

# Supporting Information

Wang *et al.* 10.1073/pnas.0804139105

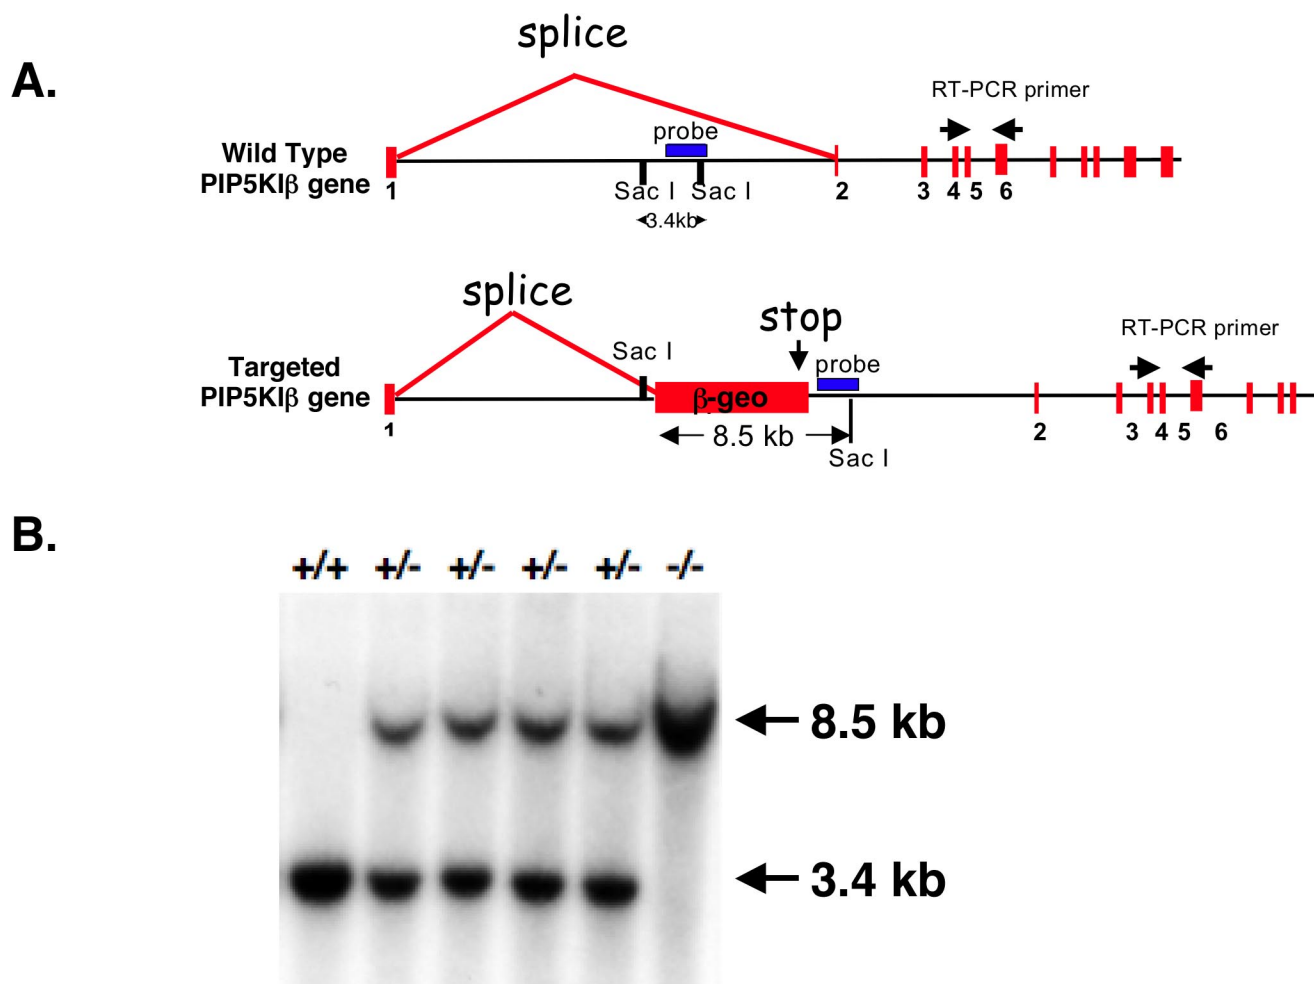

**Fig. S1.** Schematic of PIP5KI $\beta$  gene targeting. (A) Diagram showing the location of the  $\beta$ -geo within first intron of the PIP5KI $\beta$  gene. Location of the Southern blot probe is shown in blue. The insertion leads to a read-through mutation within the first intron of the targeted gene and truncate PIP5KI $\beta$  after 28 aa. (B) Southern blot of SacI-digested DNA shows a 3.4-kb (wild-type) band and a 8.5-kb (PIP5KI $\beta$ -targeted) band.

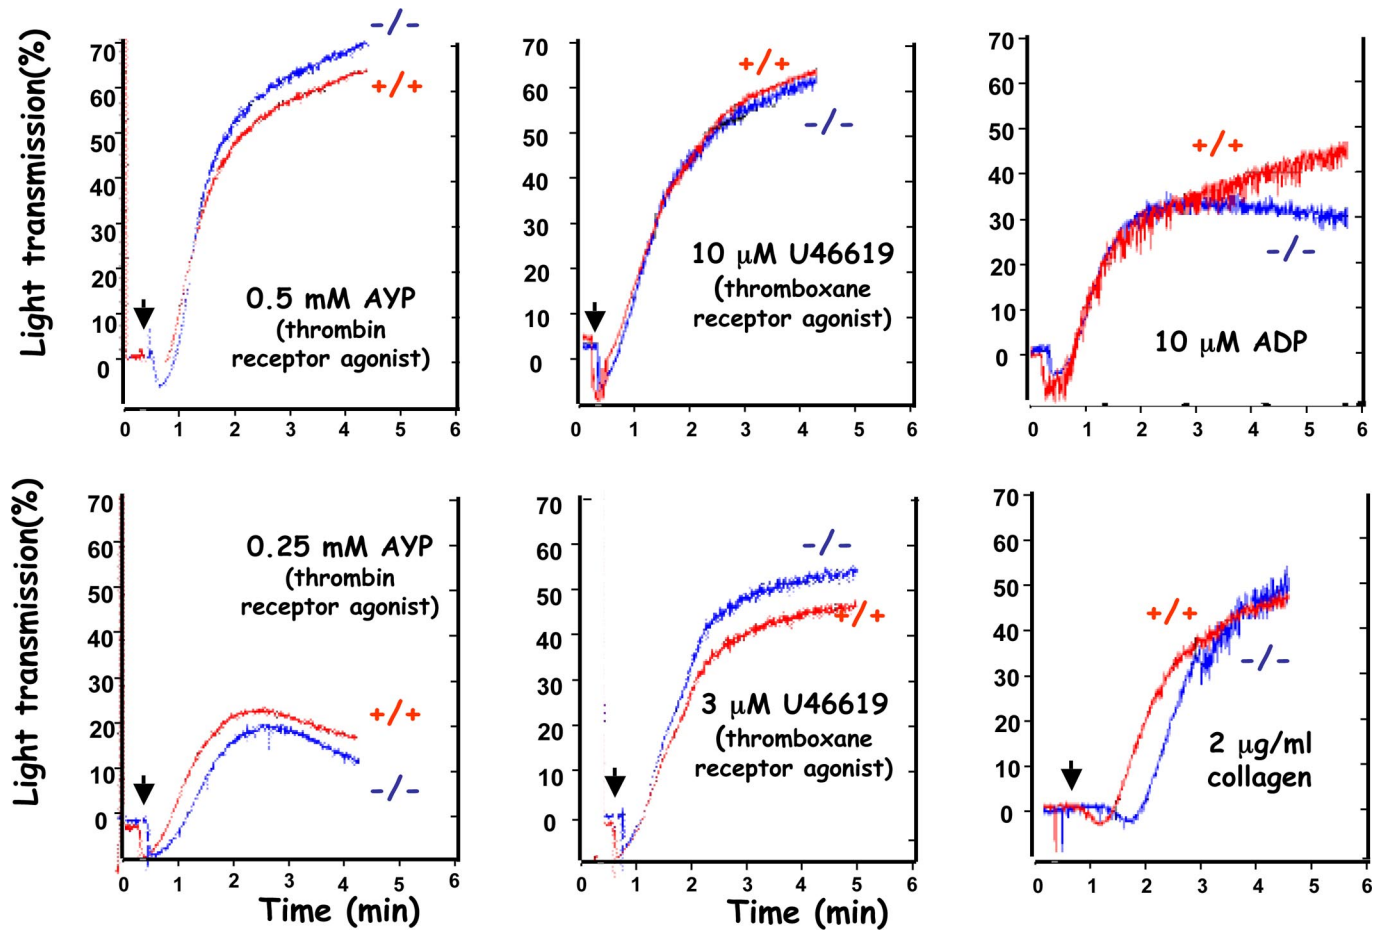

Fig. S2. PIP5K1 $\alpha$  is not required for platelet aggregation. Murine platelets lacking PIP5K1 $\alpha$  were analyzed after agonist stimulation in a Lumi-Dual aggregometer. Platelets lacking this PIP5K1 isoform aggregated normally in response to all doses of all analyzed agonists. Results are representative of six experiments.
